# Supplementary material for: The role of Psychiatric-physical multimorbidity and continuity of care in seniors’ medical emergency visits
Source: Research Square preprint supplement (doi:10.21203/rs.3.rs-6345887/v1), 2025-08-13
Supplement: Supplementary file 1 [file e88eaf4fdff628a70d1318f0.docx]

Supplemental data: Table 1. Baseline characteristics of Ontario seniors by level of non-psychiatric multimorbidity

|  |  | Physical multimorbidity  (number of non-psychiatric chronic conditions) | | | | | | | | | |
| --- | --- | --- | --- | --- | --- | --- | --- | --- | --- | --- | --- |
|  |  | Zero  N = 164,921 | | One  N = 324,529 | | Two  N = 509,556 | | Three  N = 555,279 | | Four or more  N = 1,006,701 | |
|  |  | Median (IQR) | | Median (IQR) | | Median (IQR) | | Median (IQR) | | Median (IQR) | |
| Age |  | 70 (67-75) | | 70 (67-75) | | 71 (68-77) | | 73 (69-79) | | 76 (71-83) | |
|  |  | n | % | n | % | n | % | n | % | n | % |
| Sex | Male | 89,653 | 54.4 | 161,016 | 49.6 | 232,295 | 45.6 | 239,067 | 43.1 | 450,989 | 44.8 |
| Female | 75,268 | 45.6 | 163,513 | 50.4 | 277,261 | 54.4 | 316,212 | 56.9 | 555,712 | 55.2 |
| Income Quintile | 1 (lowest) | 35,100 | 21.3 | 59,902 | 18.5 | 93,108 | 18.3 | 107,169 | 19.3 | 222,865 | 22.1 |
| 2 | 34,359 | 20.8 | 65,023 | 20.0 | 102,883 | 20.2 | 114,120 | 20.6 | 217,850 | 21.6 |
| 3 | 31,712 | 19.2 | 64,588 | 19.9 | 101,603 | 19.9 | 111,012 | 20.0 | 199,227 | 19.8 |
| 4 | 30,418 | 18.4 | 63,783 | 19.7 | 99,348 | 19.5 | 106,487 | 19.2 | 180,688 | 17.9 |
| 5 (highest) | 32,750 | 19.9 | 70,315 | 21.7 | 111,241 | 21.8 | 115,036 | 20.7 | 183,146 | 18.2 |
| Missing | 582 | 0.4 | 918 | 0.3 | 1373 | 0.3 | 1,455 | 0.3 | 2,925 | 0.3 |
| Size of Community | Urban | 143,748 | 87.2 | 278,284 | 85.8 | 439,868 | 86.3 | 484,491 | 87.3 | 889,805 | 88.4 |
| Rural | 20,660 | 12.5 | 45,437 | 14.0 | 68,466 | 13.4 | 69,507 | 12.5 | 114,292 | 12.8 |
| Missing | 513 | 0.3 | 808 | .02 | 1,222 | 0.2 | 1281 | 0.2 | 2,604 | 0.3 |
| UPC Continuity | High | 26,579 | 16.1 | 123,653 | 38.1 | 252,287 | 49.5 | 306,808 | 55.3 | 579,556 | 57.6 |
| Moderate | 10,498 | 6.4 | 42,985 | 13.2 | 83,759 | 16.4 | 97,252 | 17.5 | 178,417 | 17.7 |
| Low | 5,125 | 3.1 | 21,514 | 6.6 | 42,273 | 8.3 | 50,582 | 9.1 | 99,674 | 9.9 |
| Cannot calculate (<3 visits) | 122,719 | 74.4 | 136,377 | 42.0 | 131,237 | 25.8 | 100,637 | 18.1 | 149,054 | 14.8 |
| Mental health category | No event | 158,856 | 96.3 | 302,157 | 93.1 | 464,118 | 91.1 | 469,919 | 89.5 | 876,949 | 87.1 |
| 2+ outpatient visits | 5,199 | 3.2 | 19,855 | 6.1 | 40,849 | 8.0 | 52,714 | 9.5 | 114,896 | 11.4 |
| MH ED visit | 537 | 0.3 | 1,610 | 0.5 | 3,058 | 0.6 | 3,787 | 0.7 | 10,105 | 1.0 |
| MH hospitalization | 329 | 0.2 | 907 | 0.3 | 1,531 | 0.3 | 1,859 | 0.3 | 4,751 | 0.5 |
| Any MH event | 6,065 | 3.7 | 22,372 | 6.9 | 45,438 | 8.9 | 85,360 | 10.5 | 129,752 | 12.9 |
